# Supplementary material for: Heme oxygenase-1 alleviates advanced glycation end product-induced oxidative stress, inflammatory response and biological behavioral disorders in rat dermal fibroblasts
Source: PubMed Central journal article supplement — Exp Ther Med. 2021 Aug 24;22(5):1212. doi: 10.3892/etm.2021.10646 (PMC8422385; doi:10.3892/etm.2021.10646), 2021-08-24

Figure S1. Supplementary material of fibroblast apoptosis, proliferation and horizontal migration images. (A) Cell apoptosis, (B) cell proliferation and (C) cell horizontal migration of the remaining six groups is demonstrated. NG, normal glucose; HG, high glucose; AGEs, advanced glycation end products; CrMP, chromium mesoporphyrin.

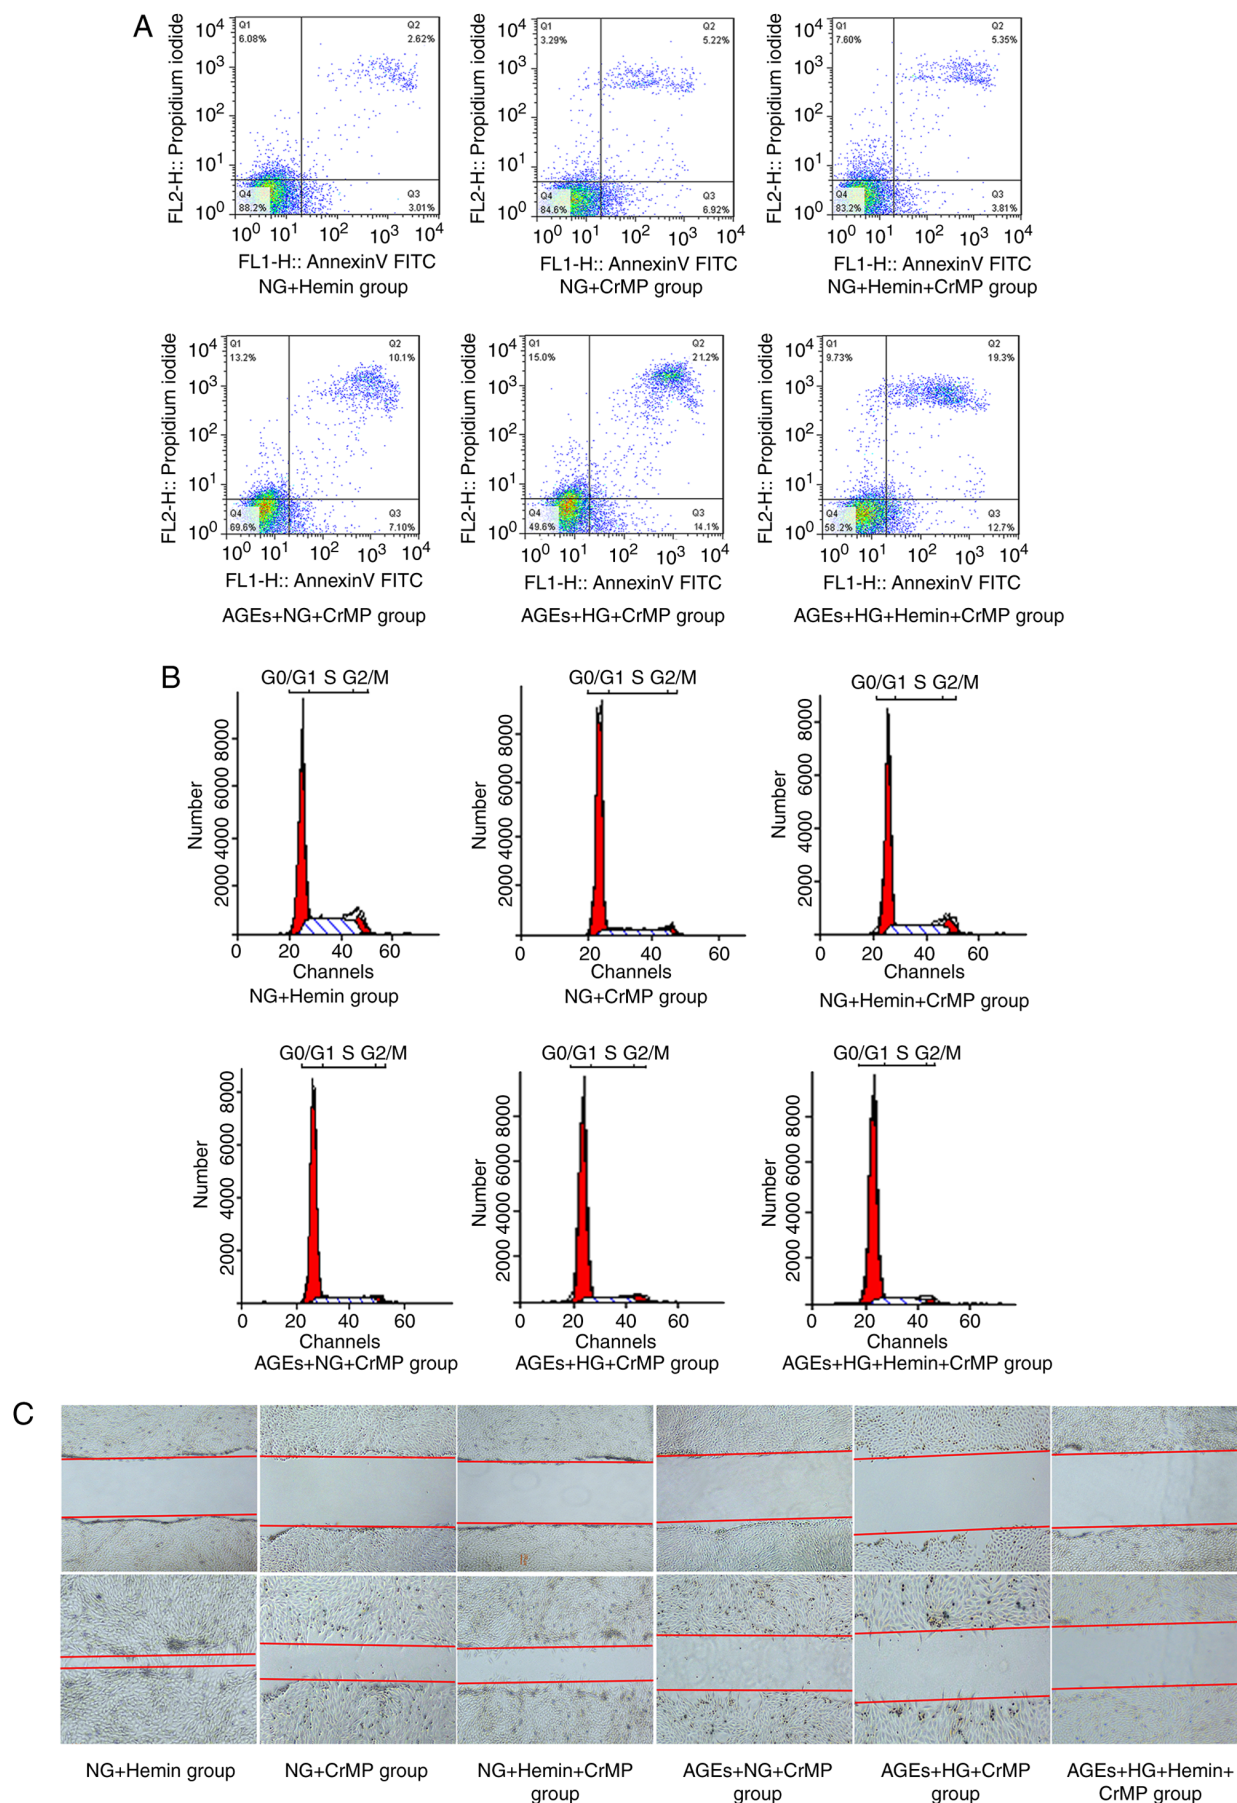

Supplement: Supplementary_Data.pdf [file Supplementary_Data.pdf]
